# Supplementary material for: Analysis of alkyl-anthraquinone derivatives from hydrogen peroxide industrial process, using LC × LC-HRMS with shifting gradients
Source: Royal Society of Chemistry journal article supplement (doi:10.1039/d4ay01905a), 2024-12-19
Supplement: d4ay01905a1.pdf [file d4ay01905a1.pdf]

## **Supplementary material**

### **Analysis of alkyl-anthraquinone derivatives from hydrogen peroxide industrial process, using LC×LC-HRMS with shifting gradients**

Clémence Giffard, Florent Rouvière, Olivier Falletti, Béatrice Allard-Breton, Laurent Wendlinger, Jean-Michel Bossoutrot, Karine Faure.

#### **Table of contents**

Table S1. QToF parameters

Figure S1. LC×LC-HRMS analysis (setup #4) of the QC sample. Peaks that were monitored to assess the repeatability of both retention time and the peak area are numbered from 1-14.

Table S1. QToF parameters

|                             |                         |
|-----------------------------|-------------------------|
| Drying Gas Flow [L/min]     | 12                      |
| Sheath Gas Flow [L/min]     | 11                      |
| Nebulizer Pressure [psig]   | 60                      |
| Sheath Gas Temperature [°C] | 350                     |
| Gas Temperature [°C]        | 150                     |
| Capillary Voltage [V]       | 5000                    |
| Fragmentor [V]              | 400                     |
| Oct 1 RF Vpp [V]            | 750                     |
| Nozzle Voltage (Expt) [V]   | 300                     |
| Cycle Time [seconds]        | 0.1                     |
| Detection mode              | SCAN from 100 to 950 Da |

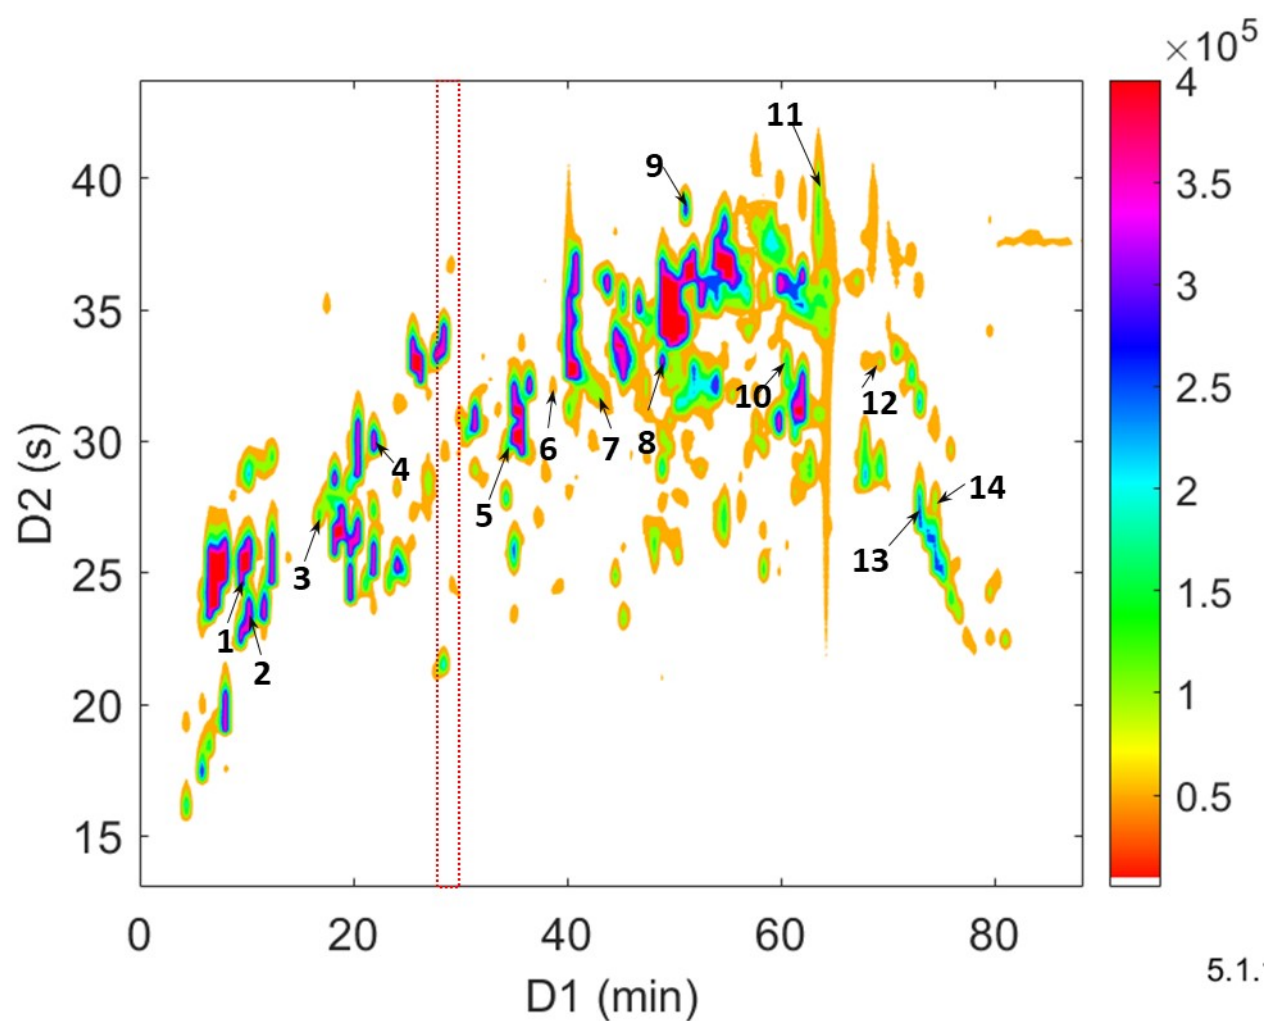

Figure S1. LCxLC-HRMS analysis (setup #4) of the QC sample. Peaks that were monitored to assess the repeatability of both retention time and the peak area are numbered from 1-14.
